# Supplementary material
Source: Springer Nature journal article supplement (https://www.springermedizin.de/resource/supplementary/13054_2011_9911_MOESM6_ESM.pdf/9708506)
Supplement: MOESM6 [file 9708506]

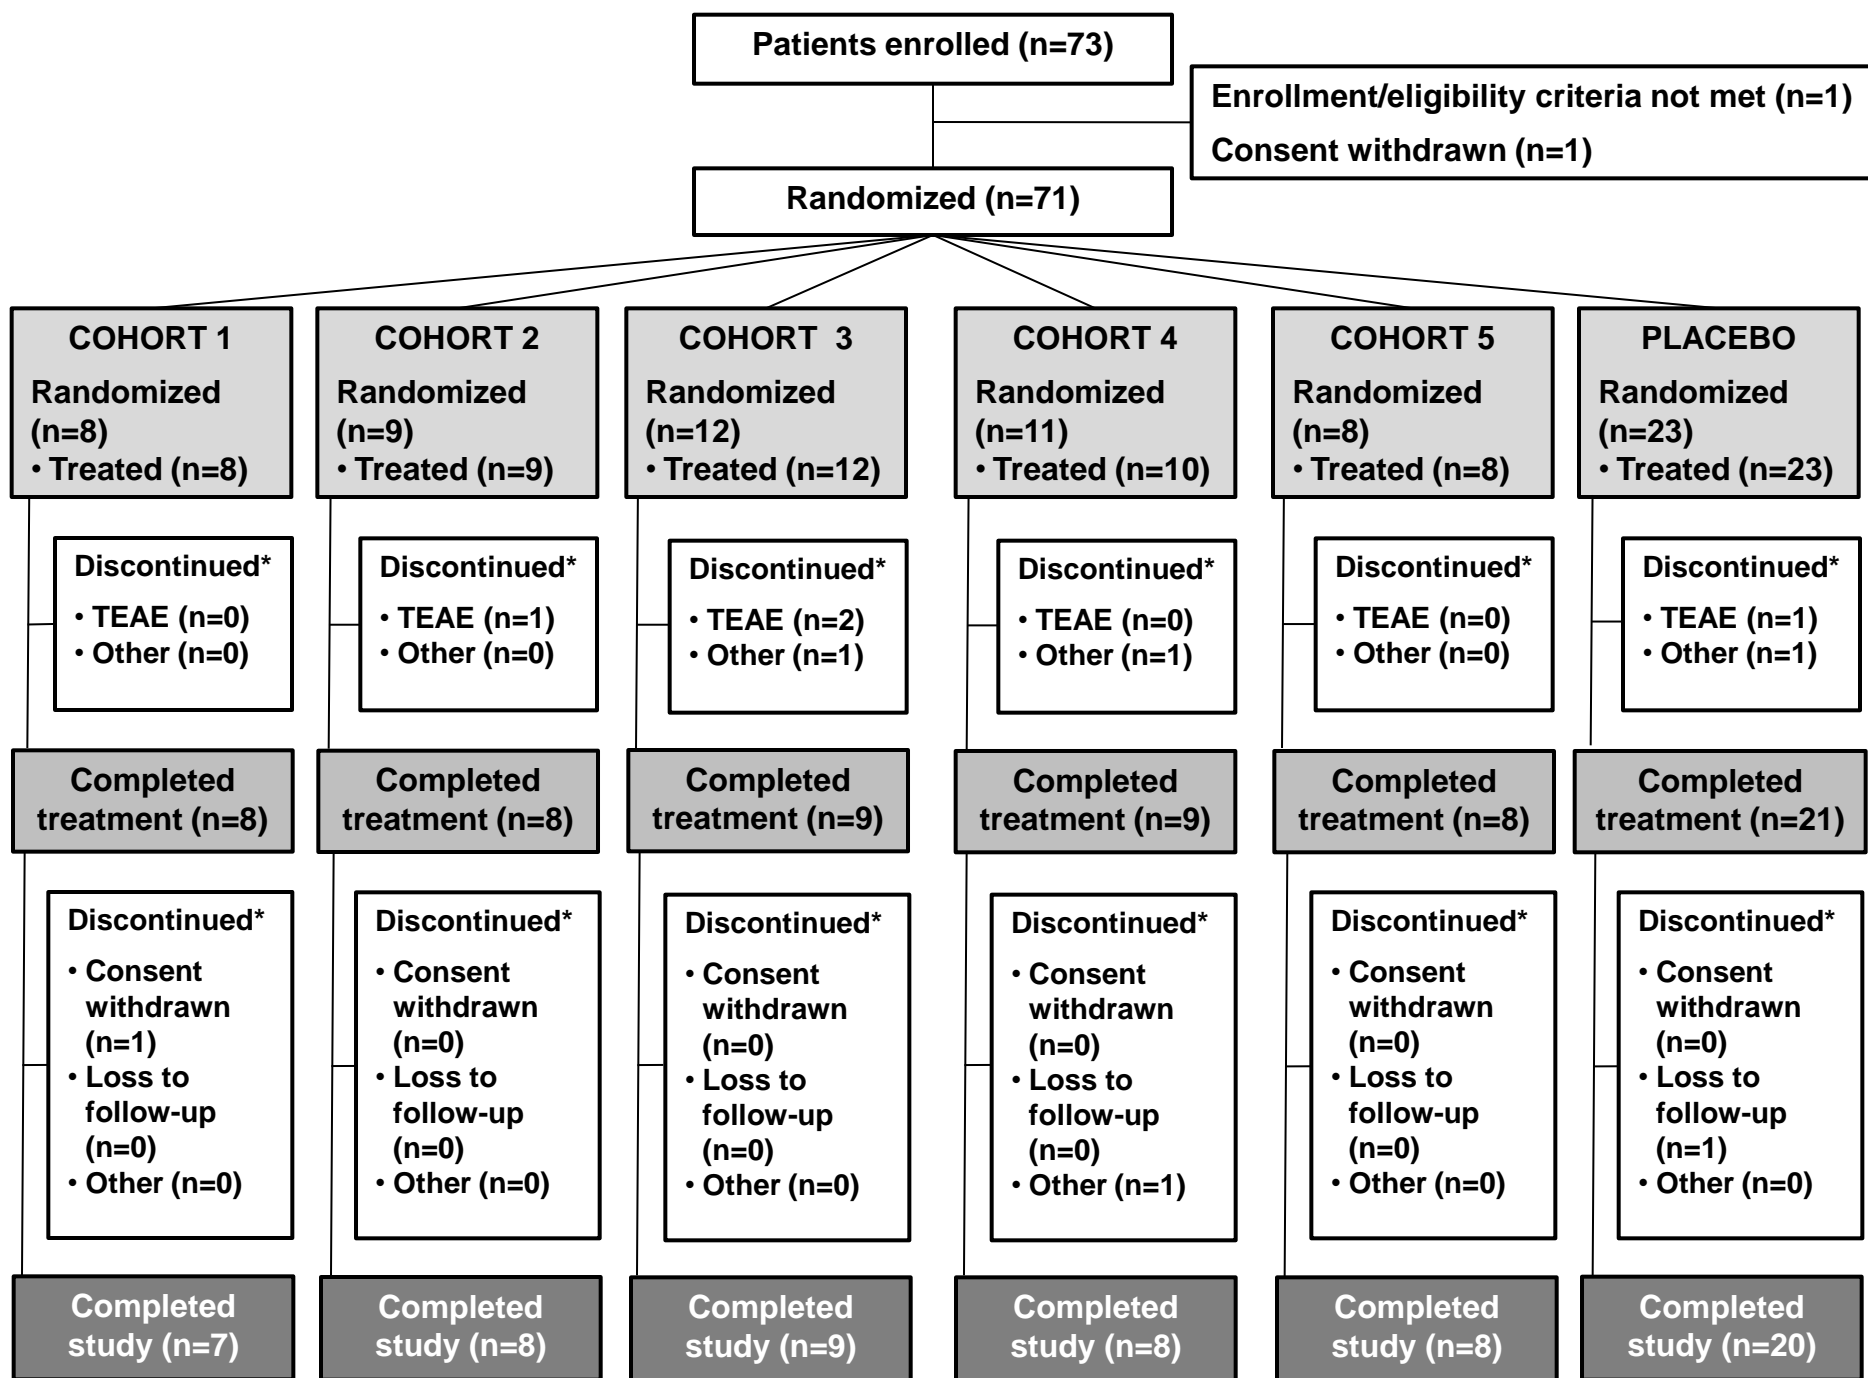

\*NOTE: Excluding death; 2, 4, 5, 1, 1 and 6 patients in AZD9773 cohorts 1–5 and placebo cohort died, but these were considered to have completed
